# Supplementary material for: The novel anticancer agent JNJ-26854165 is active in chronic myeloid leukemic cells with unmutated BCR/ABL and T315I mutant BCR/ABL through promoting proteosomal degradation of BCR/ABL proteins
Source: PubMed Central journal article supplement (PMC5352360; doi:10.18632/oncotarget.13951), 2016-12-15
Supplement: oncotarget-08-7777-s001.pdf [file oncotarget-08-7777-s001.pdf]

# The novel anticancer agent JNJ-26854165 is active in chronic myeloid leukemic cells with unmutated BCR/ABL and T315I mutant BCR/ABL through promoting proteosomal degradation of BCR/ABL proteins

## Supplementary Materials

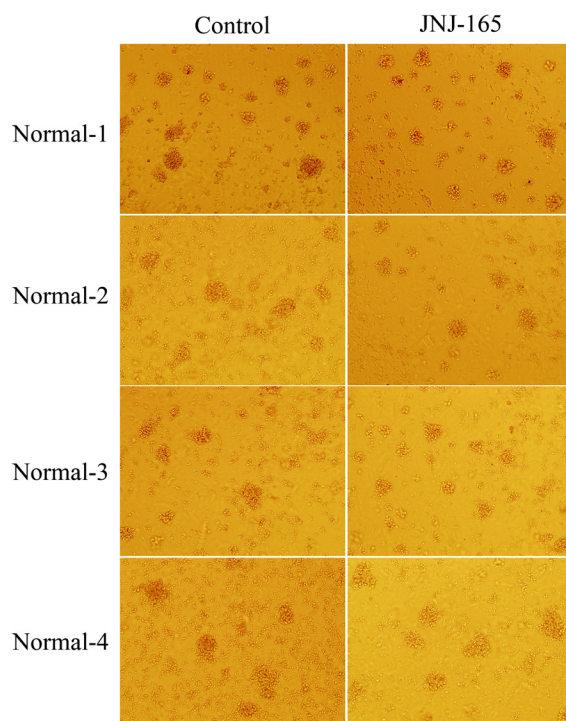

**Supplementary Figure S1: The cytotoxicity of JNJ-165 on normal hematopoietic progenitor cells.** Mononuclear cells obtained from bone marrow of four healthy volunteers were incubated in methylcellulose medium supplemented with recombinant human granulocyte-macrophage colony-stimulating factor, stem cell factor and interleukin 6 for seven days, at which time colonies were visualized with an microscope.

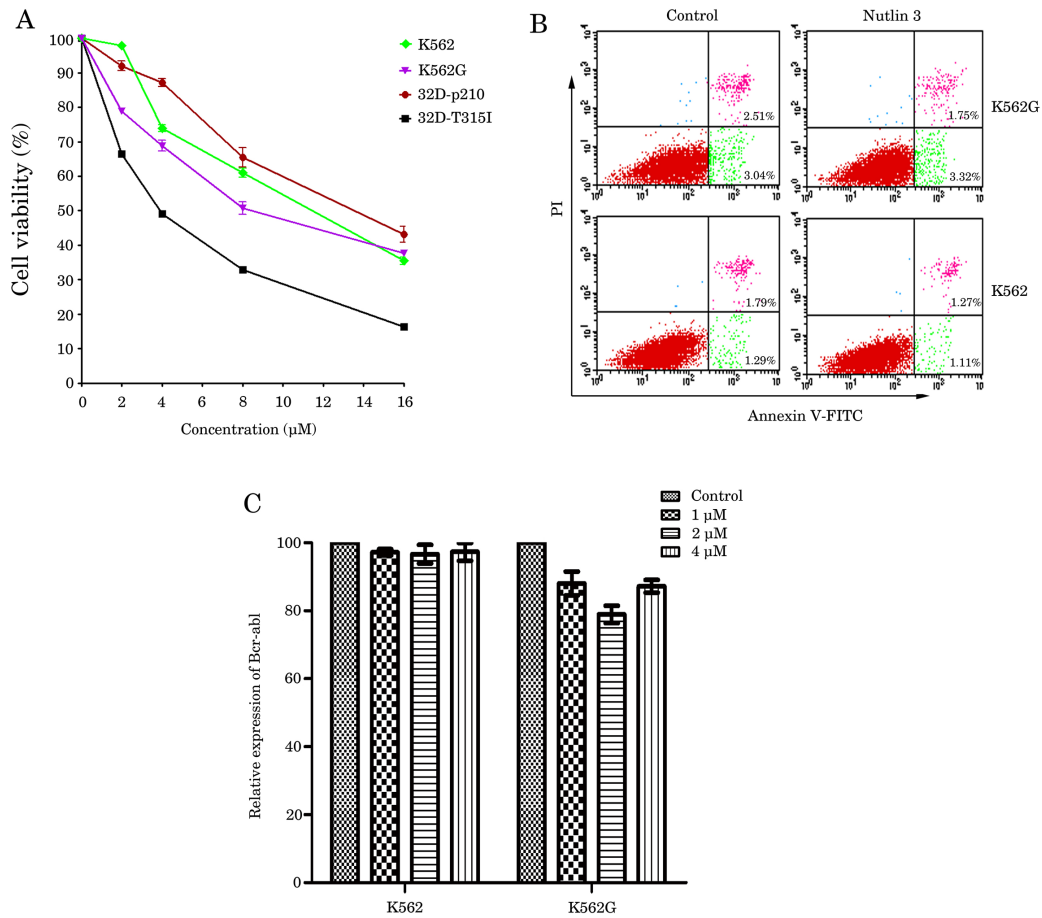

**Supplementary Figure S2: The inhibitory activity of Nutlin-3 against CML cell lines.** (A) Four kinds of CML cell lines were treated with Nutlin-3 at the indicated doses for 72 h. Growth inhibition by Nutlin-3 was assessed by an MTT assay. Data were represented mean  $\pm$  SD of three independent experiments. (B) CML Cell lines K562 and K562/G were harvested at 48 h after treatment with 5  $\mu\text{M}$  Nutlin-3. Cells were stained by an annexin V/PI-staining method and analyzed by flow cytometry. (C) RT-qPCR analysis monitoring BCR/ABL mRNA expression in K562 and K562G cells that were exposed to varying concentration of Nutlin-3 for 48 h. Bars represent SD. of three independent experiments.

**Supplementary Table S1: Clinical characteristics of CML patients**

| Patients | Sex/age, y | Diagnosis | Prior treatment       | Bcr/abl expression | Mutation    |
|----------|------------|-----------|-----------------------|--------------------|-------------|
| 1        | M/25       | CML-CP    | Imatinib              | negative           |             |
| 2        | F/70       | CML-CP    | Imatinib              | negative           |             |
| 3        | F/43       | CML-CP    | Imatinib              | negative           |             |
| 4        | F/31       | CML-CP    | Imatinib              | negative           |             |
| 5        | M/34       | CML-CP    | Imatinib              | negative           |             |
| 6        | M/48       | CML-CP    | Imatinib              | negative           |             |
| 7        | F/33       | CML-CP    | Imatinib              | negative           |             |
| 8        | M/24       | CML-CP    | Imatinib              | negative           |             |
| 9        | F/52       | CML-CP    | Imatinib              | 0.35%              |             |
| 10       | M/58       | CML-CP    | Imatinib              | negative           |             |
| 11       | F/29       | CML-CP    | Imatinib              | negative           |             |
| 12       | M/43       | CML-CP    | Imatinib              | negative           |             |
| 13       | M/62       | CML-CP    | Imatinib              | negative           |             |
| 14       | F/72       | CML-BC    | Imatinib<br>Dasatinib | 82%                | Y253H,E255K |
| 15       | F/58       | CML-BC    | Imatinib              | 87%                | M244V       |
| 16       | F/57       | CML-AP    | Hydroxyurea           | 76%                | negative    |
| 17       | M/32       | CML-AP    | Hydroxyurea           | 43%                | negative    |
| 18       | F/44       | CML-AP    | Hydroxyurea           | 114%               | negative    |
| 19       | M/48       | CML-BC    | Imatinib              | 90%                | G250E       |
| 20       | M/39       | CML-AP    | Hydroxyurea           | 120%               | negative    |
| 21       | M/65       | CML-AP    | Hydroxyurea           | 47%                | negative    |
| 22       | M/32       | CML-BC    | Imatinib              | 150%               | negative    |
| 23       | M/47       | CML-CP    | Newly diagnosed       | 130%               |             |
| 24       | M/41       | CML-CP    | Newly diagnosed       | 107%               |             |
| 25       | M/47       | CML-CP    | Newly diagnosed       | 61%                |             |
| 26       | M/22       | CML-CP    | Newly diagnosed       | 32%                |             |
| 27       | F/38       | CML-CP    | Newly diagnosed       | 25%                |             |
| 28       | M/57       | CML-CP    | Newly diagnosed       | 57%                |             |
| 29       | F/27       | CML-CP    | Newly diagnosed       | 115%               |             |
| 30       | F/55       | CML-CP    | Newly diagnosed       | 58%                |             |
| 31       | M/18       | CML-CP    | Newly diagnosed       | 70%                |             |
| 32       | M/40       | CML-CP    | Newly diagnosed       | 65%                |             |
| 33       | M/70       | CML-CP    | Newly diagnosed       | 50%                |             |
| 34       | F/72       | CML-CP    | Newly diagnosed       | 170%               |             |
| 35       | F/72       | CML-CP    | Newly diagnosed       | 81%                |             |
| 36       | M/49       | CML-CP    | Newly diagnosed       | 43%                |             |
| 37       | F/35       | CML-CP    | Newly diagnosed       | 89%                |             |
| 38       | M/37       | CML-CP    | Newly diagnosed       | 90%                |             |
| 39       | F/22       | CML-CP    | Newly diagnosed       | 87%                |             |
| 40       | F/27       | CML-CP    | Newly diagnosed       | 67%                |             |
| 41       | M/56       | CML-CP    | Newly diagnosed       | 81%                |             |
| 42       | M/61       | CML-CP    | Newly diagnosed       | 60%                |             |
| 43       | F/50       | CML-CP    | Newly diagnosed       | 56%                |             |
| 44       | F/51       | CML-CP    | Newly diagnosed       | 82%                |             |
| 45       | M/51       | CML-CP    | Newly diagnosed       | 73%                |             |
| 46       | M/64       | CML-CP    | Newly diagnosed       | 66%                |             |
